# Supplementary material
Source: Springer Nature journal article supplement (https://www.springermedizin.de/resource/supplementary/12889_2014_7198_MOESM2_ESM.pdf/9497036)

# Scatter plot

# Bland-Altman plot

## Total score

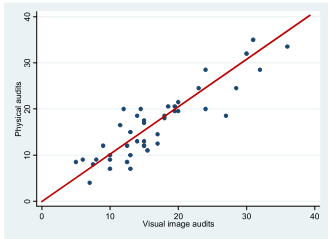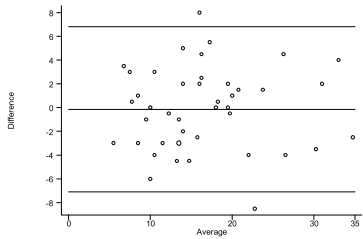

## Physical incivilities

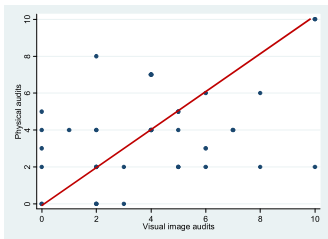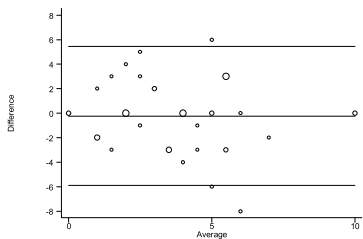

## Territorial functioning

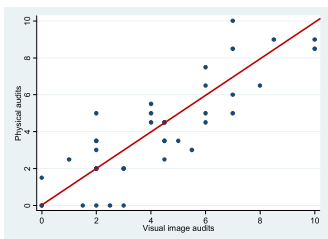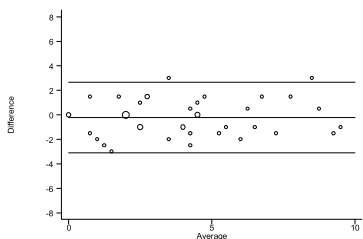

## Defensible space

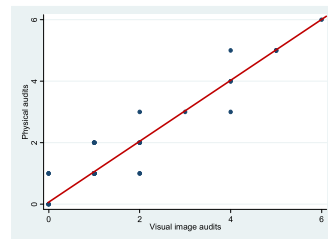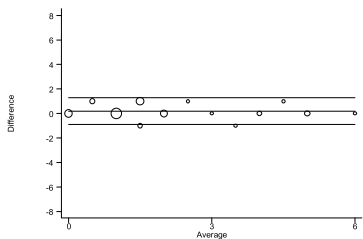

## Natural environment

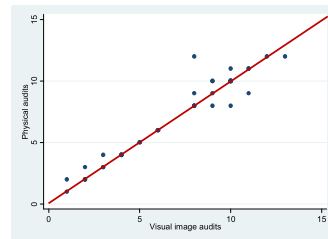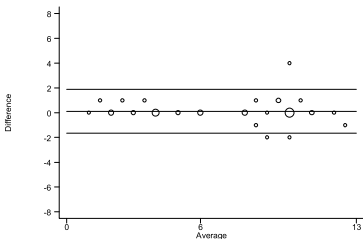

Supplement: MOESM2 [file 9497036]
